## Dose-response Relationship of Clonidine in Tetracaine Spinal Anesthesia

Fred J. Mensink, M.D.,\* Raymond Kozody, M.D., F.R.C.P.C.,† Chris H. Kehler, M.D., F.R.C.P.C.,‡  
John G. Wade, M.D., F.R.C.P.C.§

The study was undertaken to define a dose-response relationship for clonidine in prolonging canine tetracaine spinal anesthesia. Using a randomized blind cross-over design, six mongrel dogs were given subarachnoid injections (1 ml) of the following solutions over an 8-week period: tetracaine 4 mg (control), or tetracaine 4 mg with clonidine in doses of 10, 25, 50, 100, 150, 200, and 300  $\mu$ g. With clonidine doses equal to or exceeding 50  $\mu$ g/ml, motor and sensory blockade were significantly ( $P < 0.01$ ) prolonged, when compared to the control times. Analysis of data by second order polynomial regression analysis produced a relationship defined by  $Y = 23.241 + 1.104(x) - 0.0023(x^2)$  with  $r^2 = 0.92$  and  $P < 0.001$  for sensory blockade and  $Y = 38.7072 + 1.64425(x) - 0.004125(x^2)$  with  $r^2 = 0.90$  and  $P < 0.005$  for motor blockade. From these curves, a plateau in clonidine dose-response for both sensory blockade and motor blockade occurred at 150  $\mu$ g. The increase in duration of spinal anesthesia with clonidine may be related to a direct post-synaptic  $\alpha_2$  adrenoceptor arteriolar effect, a spinal cord pre- or post-synaptic  $\alpha_2$  antinociceptive action or supraspinal  $\alpha_2$  modulation of nociception. No animals showed evidence of neurologic dysfunction during the study. The authors conclude that a well-defined dose-response relationship exists for clonidine in canine tetracaine spinal anesthesia. (Key words: Adrenoceptor agonist: clonidine. Anesthetics, local: tetracaine. Anesthetic techniques: subarachnoid block. Sympathetic nervous system, catecholamine: norepinephrine.)

CLONIDINE, AN  $\alpha_2$  and  $\alpha_1$  adrenoceptor agonist, has been shown in animals to provide analgesia equal or superior to opioids when given parenterally.<sup>1</sup> Given intrathecally, clonidine is analgetic through actions at both the level of the brain and the spinal cord.<sup>2-4</sup> Recent reports have shown clonidine to be a good adjunct to narcotic analgesia when given *via* the intrathecal or epidural routes in humans.<sup>5,6</sup> The effect of clonidine on antinociception may be prolonged, lasting as long as 18 h.<sup>5</sup> Furthermore, animal work and human studies have not demonstrated neurotoxic or respiratory depressant effects following intrathecal administration.<sup>5,7</sup>

\* Research Fellow in Anesthesia.

† Assistant Professor of Anesthesia.

‡ Associate Professor of Anesthesia.

§ Professor of Anesthesia.

Received from the Department of Anesthesia, University of Manitoba, Health Sciences Centre, Winnipeg, Manitoba, Canada. Accepted for publication June 22, 1987. Presented in part at the Canadian Anaesthetists' Society Annual Meeting, June 21-25, 1986.

Address reprint requests to Dr. Mensink: Department of Anesthesia, University of Alberta Hospitals, 8440-122 Street, Edmonton, Alberta, Canada T6G 2B7.

¶ Coombs DW, Allen C, Meier FA, Fratkin JD: Chronic intraspinal clonidine in sheep. *Regional Anesthesia* 9:47-48, 1984.

Clonidine has vasoactive properties, and, when given as a bolus parenterally, produces transient hypertension, followed by hypotension. It is known to stimulate  $\alpha_1$  and  $\alpha_2$  adrenoceptors, but is primarily an  $\alpha_2$  adrenoceptor agonist on the systemic vasculature. Post-synaptic  $\alpha_2$  adrenoceptors have been shown to produce vasoconstriction of vascular smooth muscle, and appear responsible for the transient hypertension seen with parenteral clonidine.<sup>8-13</sup> Since it is believed that adrenergic mediated inhibition of tetracaine-induced vasodilation of the spinal cord and dural arteriolar circulation prolongs spinal anesthesia,<sup>14</sup> the pharmacodynamic properties of clonidine make it an attractive adjunct in spinal anesthesia.<sup>15,16</sup>

The purpose of the present study was to define a dose-response relationship for clonidine in canine tetracaine spinal anesthesia.

### Materials and Methods

Dogs were utilized from a central animal care facility and guidelines for the humane treatment of laboratory animals as outlined by The Canadian Council on Animal Care were followed. Six mongrel dogs of either sex weighing 16-21 kg were studied using a randomized blind cross-over design. Anesthesia was induced with thiopental 20-30 mg/kg injected through a cephalic vein. Following induction, the animals were placed on an operating table in the right lateral decubitus position with a 10° head-up tilt. Anesthesia was maintained with nitrous oxide, oxygen (2:1), and isoflurane (1.5-2.0%) delivered by a funnel mask to the spontaneously breathing dog. The low back region was shaved and prepared with povidone iodine from the level of the L<sub>1</sub> to the S<sub>1</sub> vertebrae. The animal was draped and lumbar puncture was performed with a 22-gauge 7-cm spinal needle at the L<sub>6</sub>-L<sub>7</sub> interspace. If this was unsuccessful, the L<sub>5</sub>-L<sub>6</sub> space was utilized. Successful dural puncture was confirmed by free flow of CSF from the needle.

Each animal received tetracaine 4 mg with clonidine in doses of 0, 10, 25, 50, 100, 150, 200, and 300  $\mu$ g in a randomized manner.

Tetracaine crystals were dissolved in 10% D/W, while clonidine crystals were dissolved in sterile H<sub>2</sub>O. The final solution injected was made up to a volume of 1 ml in D5/W. The solution was injected intrathecally over 10 s. Following the injection, anesthesia was dis-

TABLE 1. Duration of Motor and Sensory Blockade and Time to Arousal with Intrathecal Clonidine

| Clonidine<br>( $\mu\text{g/ml}$ ) | Duration of<br>Motor Blockade<br>(Min) | Duration of<br>Sensory Blockade<br>(Min) | Arousal<br>Time<br>(Min) |
|-----------------------------------|----------------------------------------|------------------------------------------|--------------------------|
| 0                                 | 188 $\pm$ 28                           | 125 $\pm$ 19                             | 23 $\pm$ 6               |
| 10                                | 253 $\pm$ 21*                          | 155 $\pm$ 7                              | 18 $\pm$ 3               |
| 25                                | 303 $\pm$ 20†                          | 158 $\pm$ 28                             | 23 $\pm$ 4               |
| 50                                | 384 $\pm$ 21†                          | 220 $\pm$ 21†                            | 30 $\pm$ 10              |
| 100                               | 405 $\pm$ 25†                          | 219 $\pm$ 16†                            | 33 $\pm$ 10              |
| 150                               | 430 $\pm$ 41†                          | 253 $\pm$ 15†                            | 39 $\pm$ 8               |
| 200                               | 455 $\pm$ 27†                          | 270 $\pm$ 27†                            | 36 $\pm$ 11              |
| 300                               | 425 $\pm$ 34†                          | 277 $\pm$ 8†                             | 41 $\pm$ 2               |

Values expressed as mean  $\pm$  SEM. N = 6 in each group.

\*  $P < 0.05$ ; †  $P < 0.01$  compared to no clonidine.

continued and the animal remained in a 10° head-up tilt for 1 min, following which it was allowed to recover in the horizontal right lateral decubitus position.

The time to arousal, defined as spontaneous movement of ears, eyes, or head, was recorded. Following arousal, sensory and motor blockade were assessed every 20 min for the first hour and every 15 min thereafter.

Motor blockade was assessed using hind limb function, the end point being the ability to stand unsupported using both hind limbs. Sensory blockade was assessed using a modified method of Eger *et al.*<sup>17</sup> A 25-cm rubber-shod hemostat was applied to the proximal third of the shaved tail for 30 s. Return of sensation was noted when a reproducible avoidance response occurred. All assessments were performed by one ob-

server unaware of the solutions being used. Following complete recovery of sensory and motor function, the animals were returned to the animal boarding facility and observed for 4–7 days. Prior to each subsequent injection, all dogs were examined for gross neurologic dysfunction.

The data were analyzed using second-order polynomial regression analysis and a randomized block ANOVA. Post-ANOVA multiple comparisons were performed using Duncan's Test. A value of  $P < 0.05$  was considered to be statistically significant.

## Results

Time from subarachnoid injection (table 1) to awakening showed a second-order polynomial relationship to the dose of clonidine administered (fig. 1). This relationship was defined by the equation, arousal time =  $20.3903 + 0.1504(\text{dose}) - 0.0003(\text{dose})^2$ , with  $r^2 = 0.82$  and  $P < 0.003$ . Regression analysis showed a strong correlation of increasing arousal time to larger doses of intrathecal clonidine, with a maximal effect being reached at 150  $\mu\text{g}$ . An apparent but nonsignificant antagonism of sedation was observed with 10  $\mu\text{g}$  of clonidine.

Both motor and sensory blockade were significantly prolonged ( $P < 0.01$ ) when clonidine in a dose of 50  $\mu\text{g}$  or greater was administered intrathecally compared to tetracaine alone (table 1). We also analyzed our results as a percentage change of control, where control was blockade time observed with tetracaine alone. This is mathematically expressed as:

$$\frac{\text{Observed Blockade Time} - \text{Control Blockade Time}}{\text{Control Time}} \times 100$$

These data points were analyzed using second-order polynomial regression analysis. The mean data are shown in figure 2.

Sensory blockade duration showed a strong correlation to the dose of intrathecal clonidine being defined by the equation: sensory blockade percentage change =  $23.241 + 1.104(\text{dose}) - 0.0023(\text{dose})^2$ , with  $r^2 = 0.92$  and  $P < 0.001$ . Motor blockade also showed a good correlation with the dose of clonidine administered being defined by the equation: motor blockade percentage change =  $38.7072 + 1.64425(\text{dose}) - 0.004125(\text{dose})^2$ , with  $r^2 = 0.90$  and  $P < 0.005$ . Both curves constructed from the above equations demonstrate a plateau of clinical effect at a clonidine dose of 150  $\mu\text{g}$ .

No dog showed evidence of neurologic dysfunction after each individual injection. At the conclusion of the

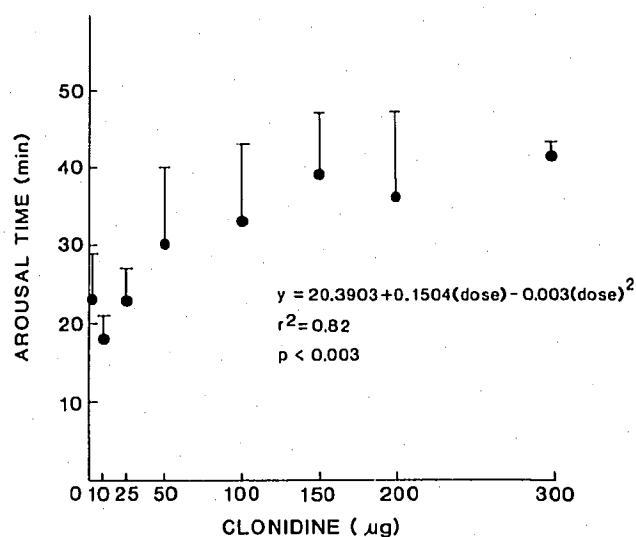

FIG. 1. Time to arousal following increasing doses of intrathecal clonidine. n = 6 in each group. Values expressed as mean  $\pm$  SEM. Maximal effect is observed with clonidine 150  $\mu\text{g}$ . A possible non-significant antagonism is observed with clonidine 10  $\mu\text{g}$ .

study, performed over an 8-week period, all dogs were in good health and without signs of gross neurologic damage.

### Discussion

The present study demonstrates a dose-response relationship for both motor and sensory blockade to intrathecal clonidine in tetracaine spinal anesthesia. The duration of sensory or motor blockade did not change significantly with doses of intrathecal clonidine above 150  $\mu$ g. Clonidine in a dose of 150  $\mu$ g has been shown to prolong tetracaine spinal anesthesia in dogs, and, more recently, bupivacaine spinal anesthesia in humans, without adverse effects.<sup>15,16</sup>

Parenteral clonidine is a potent  $\alpha_2$  agonist which produces initial vasoconstriction of systemic vessels related to its ability to stimulate post-synaptic vascular  $\alpha_2$  adrenoceptors.<sup>8-12</sup> In the intact animal following parenteral clonidine, vasoconstriction and hypertension is soon followed by centrally mediated hypotension. This appears related to the central effect of clonidine on the sympathetic nervous system and its ability to decrease catecholamine turnover.<sup>18-21</sup>

The effect of a high dose of intrathecal clonidine (150  $\mu$ g) on the spinal cord circulation is vasodilatory, possibly through an  $\alpha_2$  pre-synaptic sympathetic inhibitory mechanism similar to its antihypertensive effect.<sup>22</sup> A similar tendency has been demonstrated with high-dose intrathecal norepinephrine and epinephrine (combined  $\alpha_1$  and  $\alpha_2$  adrenergic agonists), which do not produce vasoconstriction, but have a tendency to vasodilation.<sup>23,24</sup> Low-dose intrathecal clonidine produced by the transdural flux of epidural clonidine may produce a small reduction in spinal cord blood flow, possibly by stimulating post-synaptic  $\alpha_2$  vascular adrenoceptors; however, controlled studies are required.<sup>25</sup>

Kozody *et al.*<sup>14</sup> proposed that adrenergic agonists prolong the duration of tetracaine spinal anesthesia not through vasoconstriction, but by inhibiting spinal cord and dural arteriolar vasodilation normally induced by tetracaine. The local vasoactive effects of intrathecal clonidine may be sufficient to prevent the early arteriolar vasodilation seen with intrathecal tetracaine and delay its removal from the cerebrospinal fluid. Clonidine may, in part, act through a mechanism similar to epinephrine in prolonging time to two segment regression with tetracaine spinal anesthesia.<sup>15</sup>

Clonidine in addition has been shown to have potent analgesic properties when given by the intrathecal, epidural, intravascular, or intraperitoneal routes.<sup>1-6,26</sup> This analgesia is independent of opioid receptor stimulation because it is not reversed with naloxone.<sup>1,2,27</sup> The effect of both norepinephrine and clonidine on

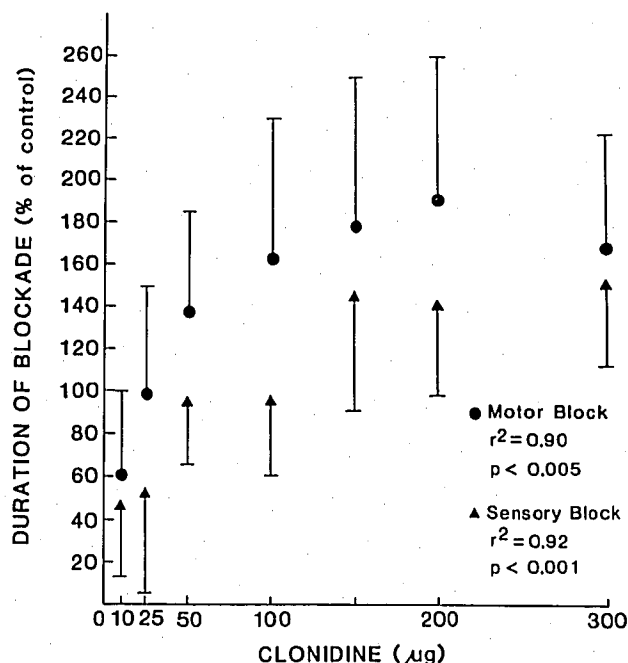

FIG. 2. Effect of increasing doses of clonidine on duration of sensory and motor blockade with tetracaine spinal anesthesia.  $n = 6$  in each group. Values expressed as mean  $\pm$  SEM. A maximal effect on both sensory and motor blockade is observed with clonidine 150  $\mu$ g.

analgesia has been reversed by alpha antagonists, such as yohimbine, tolazoline, phentolamine, and piperoxan.<sup>2,19,28</sup> Furthermore, the effect of alpha agonists to increase the nociceptive threshold is not reversed by the use of vasodilators, such as isoproterenol, bradykinin or papaverine.<sup>2,28</sup> Indeed, the nociceptive threshold could not be elevated, using angiotensin-II in an attempt to mimic the effect of vasoconstrictors on analgesia.<sup>2</sup>

Attempts have been made to localize the site of action of alpha agonist antinociception. This includes spinal cord transection, stimulation, or ablation of individual brain stem centers, and iontophoretic application of putative analgetics. Stimulation of supraspinal brainstem centers, such as the locus coeruleus, raises the nociceptive threshold.<sup>29-32</sup> Destruction of the locus coeruleus caused a reduction in the nociceptive threshold in animals.<sup>33-34</sup> These experiments and others have shown the importance of higher centers in modulating pain. However, it appears the antinociceptive site of action of clonidine is primarily at the level of the spinal cord. Work with catecholamines placed iontophoretically at the level of the spinal cord has shown decreased nociceptive discharge.<sup>35-37</sup> Spaulding *et al.*<sup>4</sup> transected spinal cords at the mid-thoracic level and showed that clonidine was equally effective at raising the nociceptive threshold, when compared to the control (intact spinal cord) animals. They concluded that clonidine was act-

ing at the spinal cord level. Zemlan *et al.*<sup>38</sup> also demonstrated the same result, and concluded that clonidine produces analgesia by affecting interneurons which cause primary afferent depolarization of cutaneous sensory fibers resulting in attenuation of pain. Calvillo and Ghignone<sup>39</sup> showed that clonidine caused primary afferent depolarization of intraspinal cutaneous C fibers resulting in decreased transmitter release. This effect was reversed by yohimbine, thereby implicating  $\alpha_2$  adrenoceptor stimulation. Furthermore, other researchers using subarachnoid catheters placed over the lumbar spinal cord showed a differential effect of clonidine on analgesia of the hind limbs *versus* the forelimbs.<sup>2,7,27,28</sup>

Clonidine is a lipid soluble drug and, as such, has access to the central compartment. However, when given intrathecally, the effects of systemic access and subsequent supraspinal redistribution appears to have had little effect on pain modulation in the forelimbs of animals given as much 2000  $\mu$ g of intrathecal clonidine in the lumbar region.<sup>7</sup> Presumably, the concentration of clonidine remains high at the injection site and lower in the blood, related to regional binding and rapid redistribution from the vascular compartment. If this was not the case, clonidine should have increased the nociceptive threshold equally in the forelimbs, as was demonstrated in previous work, where intraperitoneal and intravenous clonidine was utilized. We, therefore, believe that, while supraspinal actions are present, especially at the higher dosages, the preceding data indicate that the primary effect of clonidine in prolonging tetracaine anesthesia is at the level of the spinal cord. Further work utilizing systemic clonidine in tetracaine spinal anesthesia is required to validate the hypothesis.

The duration of elevation of nociceptive thresholds has varied in animals, and has been reported to be as long as 18 h in man.<sup>5</sup> The duration of analgesia appears to exceed the duration of spinal sensory blockade, and may provide continuing postoperative analgesia when the demand for analgesic agents are high. This may allow for early ambulation, since motor function is spared.

There was no gross clinical evidence in any animal of neurotoxicity after each injection or at the conclusion of the study, which took 8 weeks. This agrees with clinical observations in humans given intrathecal<sup>5,16</sup> and epidural clonidine,<sup>6</sup> and experimental work in animals involving histological examinations of the spinal cord.<sup>71</sup>

The demonstrated dose-dependent effects of clonidine in prolonging time to awakening following general anesthesia are consistent with previous studies showing sedation<sup>20,40,41</sup> and a reduction in anesthetic requirements.<sup>42,43</sup> The sedating effects of clonidine have been reversed by administration of  $\alpha_2$  antagonists.<sup>20,42</sup> It

is believed that clonidine activates presynaptic inhibitory  $\alpha_2$  adrenoceptors located on the noradrenergic neurons of the locus coeruleus, resulting in a decrease in activity with sedation and sleep.<sup>20</sup> Clonidine, with a tissue partition coefficient of 39 (incorporates ionization correction), is highly lipid soluble and will cross tissue barriers rapidly.<sup>44</sup> Following intrathecal administration, vascular access to the supra-spinal C.N.S., rather than C.S.F., circulation is believed to produce sedation.<sup>45</sup> The mechanism by which clonidine gains access to the C.N.S. may, therefore, be similar to that demonstrated for intrathecal lipid soluble narcotics, such as fentanyl and meperidine.<sup>46</sup> The C.N.S. sedating properties of clonidine may offer additional benefits in spinal anesthesia, especially in situations where supplemental intravenous sedation was previously required.

In conclusion, intrathecal clonidine, when utilized as an adjunct to tetracaine spinal anesthesia, prolongs the duration of motor and sensory blockade. A dose-response relationship exists with the maximal effect seen, in dogs, at a dose of 150  $\mu$ g. We feel that the addition of clonidine to spinal anesthesia may have distinct advantages because of its presently demonstrated ability to prolong motor and sensory blockade and its previously demonstrated ability to elevate the nociceptive threshold, combined with its sedating properties. A possible role in other forms of regional anesthesia remains to be demonstrated.

We wish to acknowledge the assistance of Dr. Tom Hassard, Ph.D., Department of Biostatistics, University of Manitoba, with the statistical analysis and the Boehringer Ingelheim Corporation which supplied the clonidine.

## References

1. Spaulding TC, Fielding S, Venafro JJ, Harbens L: Antinociceptive activity of clonidine and its potentiation of morphine analgesia. *Eur J Pharmacol* 58:19-25, 1979
2. Reddy SVR, Maderdrut JL, Yaksh TL: Spinal cord pharmacology of adrenergic agonist-mediated antinociception. *J Pharmacol Exp Ther* 213:525-533, 1980
3. Yasuoka S, Yaksh TL: Effects on nociceptive threshold and blood pressure of intrathecally administered morphine and alpha adrenergic agonists. *Neuropharmacology* 22:309-315, 1983
4. Spaulding TC, Venafro JJ, Ma MG, Fielding S: The dissociation of the antinociceptive effect of clonidine from supraspinal structures. *Neuropharmacology* 18:103-105, 1979
5. Coombs DW, Saunders RL, Lachance D, Savage S, Ragnarsson TS, Jensen LE: Intrathecal morphine tolerance: Use of clonidine, DADLE, and intraventricular morphine. *ANESTHESIOLOGY* 62:358-363, 1985
6. Tamsen A, Gordh T: Epidural clonidine produces analgesia. *Lancet* 2:231-232, 1984
7. Yaksh TL, Reddy SVR: Studies in the primate on the analgesic effects associated with intrathecal actions of opiates, alpha adrenergic agonists and baclofen. *ANESTHESIOLOGY* 54:451-467, 1981

8. Langer SZ, Hicks PE: Physiology of the sympathetic nerve ending. *Br J Anaesth* 56:689-700, 1984
9. Kiowski W, Hulthen UL, Ritz R, Buhler FR: Alpha<sub>2</sub> adrenoceptor-mediated vasoconstriction of arteries. *Clin Pharmacol Ther* 34:565-569, 1983
10. Drew GM, Whiting SB: Evidence for two distinct types of post-synaptic alpha-adrenoceptors in vascular smooth muscle in vivo. *Br J Pharmacol* 67:207, 1979
11. Ruffolo RR, Yaden EL, Waddell JE: Receptor interactions of imidazolines. V. clonidine differentiates postsynaptic alpha adrenergic receptor subtypes in tissues from the rat. *J Pharmacol Exp Ther* 213:557-561, 1980
12. Sanders KH, Jurna I: Effects of urapidil, clonidine, prazosin and propranolol on autonomic nerve activity, blood pressure and heart rate in anesthetized rats and cats. *Eur J Pharmacol* 110:181-190, 1985
13. Yamaguchi I, Kopin IJ: Differential inhibition of alpha-1 and alpha-2 adrenoceptor mediated pressor responses in pithed rats. *J Pharmacol Exp Ther* 214:275-281, 1980
14. Kozody R, Palahniuk RJ, Cumming MO: Spinal cord blood flow following subarachnoid tetracaine. *Can Anaesth Soc J* 32:23-29, 1985
15. Bedder MD, Kozody R, Palahniuk RJ, Cumming MO, Pucci WR: Clonidine prolongs canine tetracaine spinal anesthesia. *Can Anaesth Soc J* 33:591-596, 1986
16. Racle JP, Benkhadra A, Poy JY, Gleizal B: Prolongation of isobaric bupivacaine spinal anesthesia with epinephrine and clonidine for hip surgery in the elderly. *Anesth Analg* 66:442-446, 1987
17. Eger EI, Saidman LJ, Brandstater B: Minimum alveolar anesthetic concentration: A standard of anesthetic potency. *ANESTHESIOLOGY* 26:756-763, 1965
18. Svensson TH, Bunhy BS, Aghajanian GK: Inhibition of both noradrenergic and serotonergic neurons in brain by the adrenergic agonist clonidine. *Brain Res* 92:291-295, 1975
19. Guyenet PG: The coeruleospinal noradrenergic neurons: Anatomical and electrophysiological studies in the rat. *Brain Res* 189:121-133, 1980
20. Autret A, Minz M, Beillevaire T, Cathala HP, Schmitt H: Effects of clonidine on sleep patterns in man. *Eur J Clin Pharmacol* 12:319-322, 1977
21. Anden NE, Grabowska M, Strömbom U: Different alpha adrenoceptors in the central nervous system mediating biochemical and functional effects of clonidine and receptor blocking agents. *Arch Pharmacol* 292:43-52, 1976
22. Mensink FJ, Kozody R, MacIntyre C, Wade JG, Ghignone M: Alpha<sub>2</sub> adrenoceptor stimulation increases regional spinal cord blood flow. *Can J Anaesth* 34:S115, 1987
23. Crosby G, Szabo M: The local spinal blood flow effect of intrathecal norepinephrine in conscious rats (abstract). *ANESTHESIOLOGY* 63:A214, 1985
24. Kozody R, Palahniuk RJ, Wade JG, Cumming MO, Pucci WR: The effect of subarachnoid epinephrine and phenylephrine on spinal cord blood flow. *Can Anaesth Soc J* 31:503-508, 1984
25. Gordh T Jr, Feuk U, Norlen K: Effect of epidural clonidine on spinal cord blood flow, and regional and central hemodynamics in pigs. *Anesth Analg* 65:1312-1318, 1986
26. Schmitt H, LeDouarec JC, Petillot N: Antinociceptive effects of some alpha sympathomimetic agents. *Neuropharmacology* 13:289-294, 1974
27. Milne B, Cervenka FW, Jhamandas K, Sutak M: Intrathecal clonidine: Analgesia and effects on opiate withdrawal in the rat. *ANESTHESIOLOGY* 62:34-38, 1985
28. Reddy SR, Yaksh TL: Spinal noradrenergic terminal system mediates antinociception. *Brain Res* 189:391-401, 1980
29. Mokha SS, McMillan JA, Iggo A: Descending control of spinal nociceptive transmission. Actions produced on spinal multireceptive neurones from nuclei locus coeruleus (LC) and raphe magnus (RM). *Exp Brain Res* 58:213-226, 1985
30. Felds HL, Basbaum AI: Brainstem control of spinal pain transmission neurons. *Annu Rev Physiol* 40:217-248, 1978
31. Mayer DJ, Liebeskind JC: Pain reduction by focal electrical stimulation of the brain. An anatomical and behavioural analysis. *Brain Res* 68:73-93, 1974
32. Sasa M, Munekiyo K, Ikeda H, Takaori S: Noradrenaline mediated inhibition by locus coeruleus of spinal trigeminal neurons. *Brain Res* 80:443-460, 1974
33. Kostowski W, Jerlicz M, Bidzinski A, Hauptman M: Reduced analgesic effects of morphine after bilateral lesions of the locus coeruleus in rats. *Pol J Pharmacol Pharm* 30:49-53, 1978
34. Sasa M, Munekiyo K, Ikeda H, Takaori S: Attenuation of morphine analgesia in rats with lesions of the locus coeruleus and dorsal raphe nucleus. *Eur J Pharmacol* 42:53-62, 1977
35. Belcher G, Ryall RW, Schaffner R: The differential effects of 5-hydroxytryptamine, noradrenaline and raphe stimulation on nociceptive and non-nociceptive dorsal horn interneurons in the cat. *Brain Res* 151:307-321, 1978
36. Fleetwood-Walker SM, Mitchell R, Hope PJ, Molony V, Iggo A: An alpha<sub>2</sub> receptor mediates the selective inhibition by noradrenaline of nociceptive responses of identified dorsal horn neurones. *Brain Res* 334:243-254, 1985
37. Headley PM, Duggan AW, Griersmith BT: Selective reduction of noradrenaline and 5-hydroxytryptamine of nociceptive responses of cat dorsal horn neurones. *Brain Res* 145:185-189, 1978
38. Zemlan FP, Corrigan SA, Pfaff DW: Noradrenergic and serotonergic mediation of spinal analgesia mechanisms. *Eur J Pharmacol* 61:111-124, 1980
39. Calvillo O, Ghignone M: Presynaptic effect of clonidine on unmyelinated afferent fibers in the spinal cord of the cat. *Neurosci Lett* 64:335-339, 1986
40. Delbarre B, Schmitt H: A further attempt to characterize sedative receptors activated by clonidine in chickens and mice. *Eur J Pharmacol* 22:355-359, 1973
41. Holman RB, Shillito EE, Vogt M: Sleep produced by clonidine (2-(2,6-dichlorophenylamino)-2-imidazoline hydrochloride). *Br J Pharmacol* 43:685-695, 1974
42. Bloor BC, Flacke WE: Reduction in halothane anesthetic requirement by clonidine, an alpha adrenergic agonist. *Anesth Analg* 61:741-745, 1982
43. Kaukinen S, Pyykko K: The potentiation of halothane anaesthesia by clonidine. *Acta Anaesthesiol Scand* 239:107-111, 1979
44. Timmermans PBMWM, Brands A, Van Zwieteran PA: Lipophilicity and brain disposition of clonidine and structurally related imidazolidines. *Arch Pharmacol* 300:217-226, 1977
45. Marwaha J, Kehne JH, Commissaris RL, Lakoski J, Shaw W, Davis M: Spinal clonidine inhibits neural firing in locus coeruleus. *Brain Res* 276:379-382, 1983
46. Cousins MJ, Mather LE: Intrathecal and epidural administration of opioids. *ANESTHESIOLOGY* 61:276-310, 1984
